# Supplementary material for: Bringing an important macrocycle into a polyoxometalate matrix: synthesis, crystal structure, spectroscopy and electrochemistry of [CoIII(transdiene)(Cl)2]2[Mo6O19], [NiII(transdiene)][W6O19]·DMSO·DCM and [ZnII(transdsiene)(Cl)]2[W6O19]
Source: Royal Society of Chemistry journal article supplement (doi:10.1039/c0dt01208d), 2011-01-01
Supplement: c0dt01208d.pdf [file c0dt01208d.pdf]

## **Supporting Information**

**Bringing an important macrocycle into polyoxometalate matrix:  
synthesis, crystal Structure, spectroscopy and electrochemistry of  
[Co<sup>III</sup>(transdiene)(Cl)<sub>2</sub>]<sub>2</sub>[Mo<sub>6</sub>O<sub>19</sub>], [Ni<sup>II</sup>(transdiene)][W<sub>6</sub>O<sub>19</sub>]  
·DMSO·DCM and [Zn<sup>II</sup>(transdiene)(Cl)<sub>2</sub>][W<sub>6</sub>O<sub>19</sub>]**

Monima Sarma, Tanmay Chatterjee and Samar K. Das\*

School of Chemistry, University of Hyderabad, P.O. Central University, Hyderabad  
500046, Andhra Pradesh, India  
E-mail: skdsc@uohyd.ernet.in

SI-Figure 1. FT-IR spectrum of compound 1 (KBr pellet,  $\text{cm}^{-1}$ )

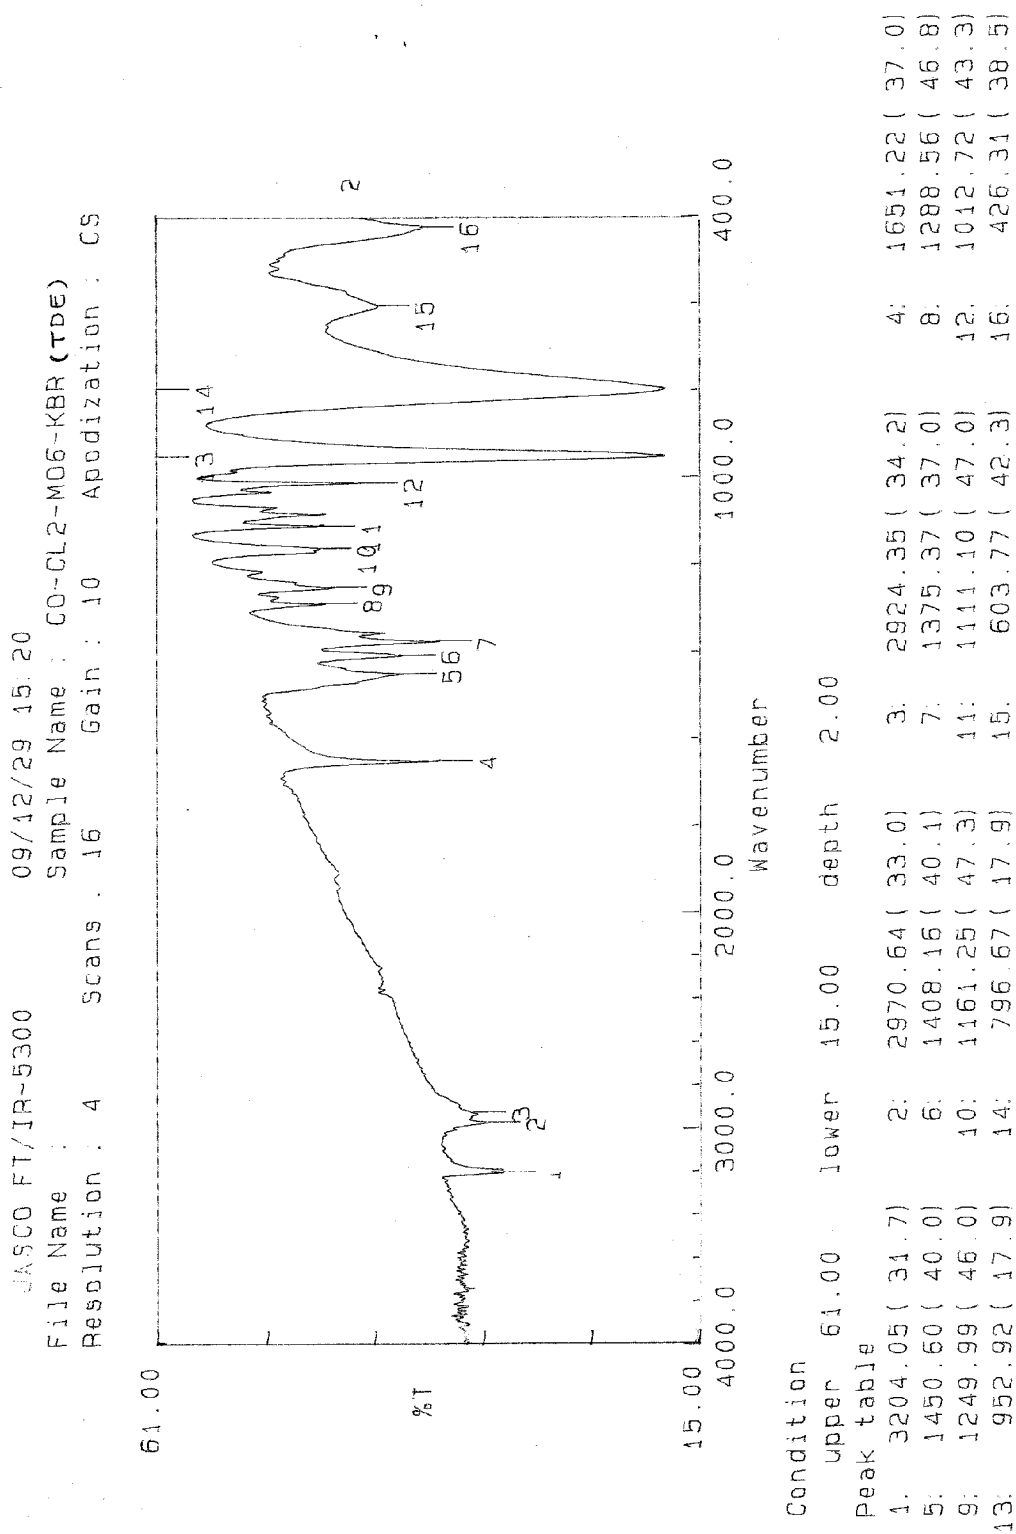

SI-Figure 2. FT-IR spectrum of compound 2 (KBr pellet,  $\text{cm}^{-1}$ )

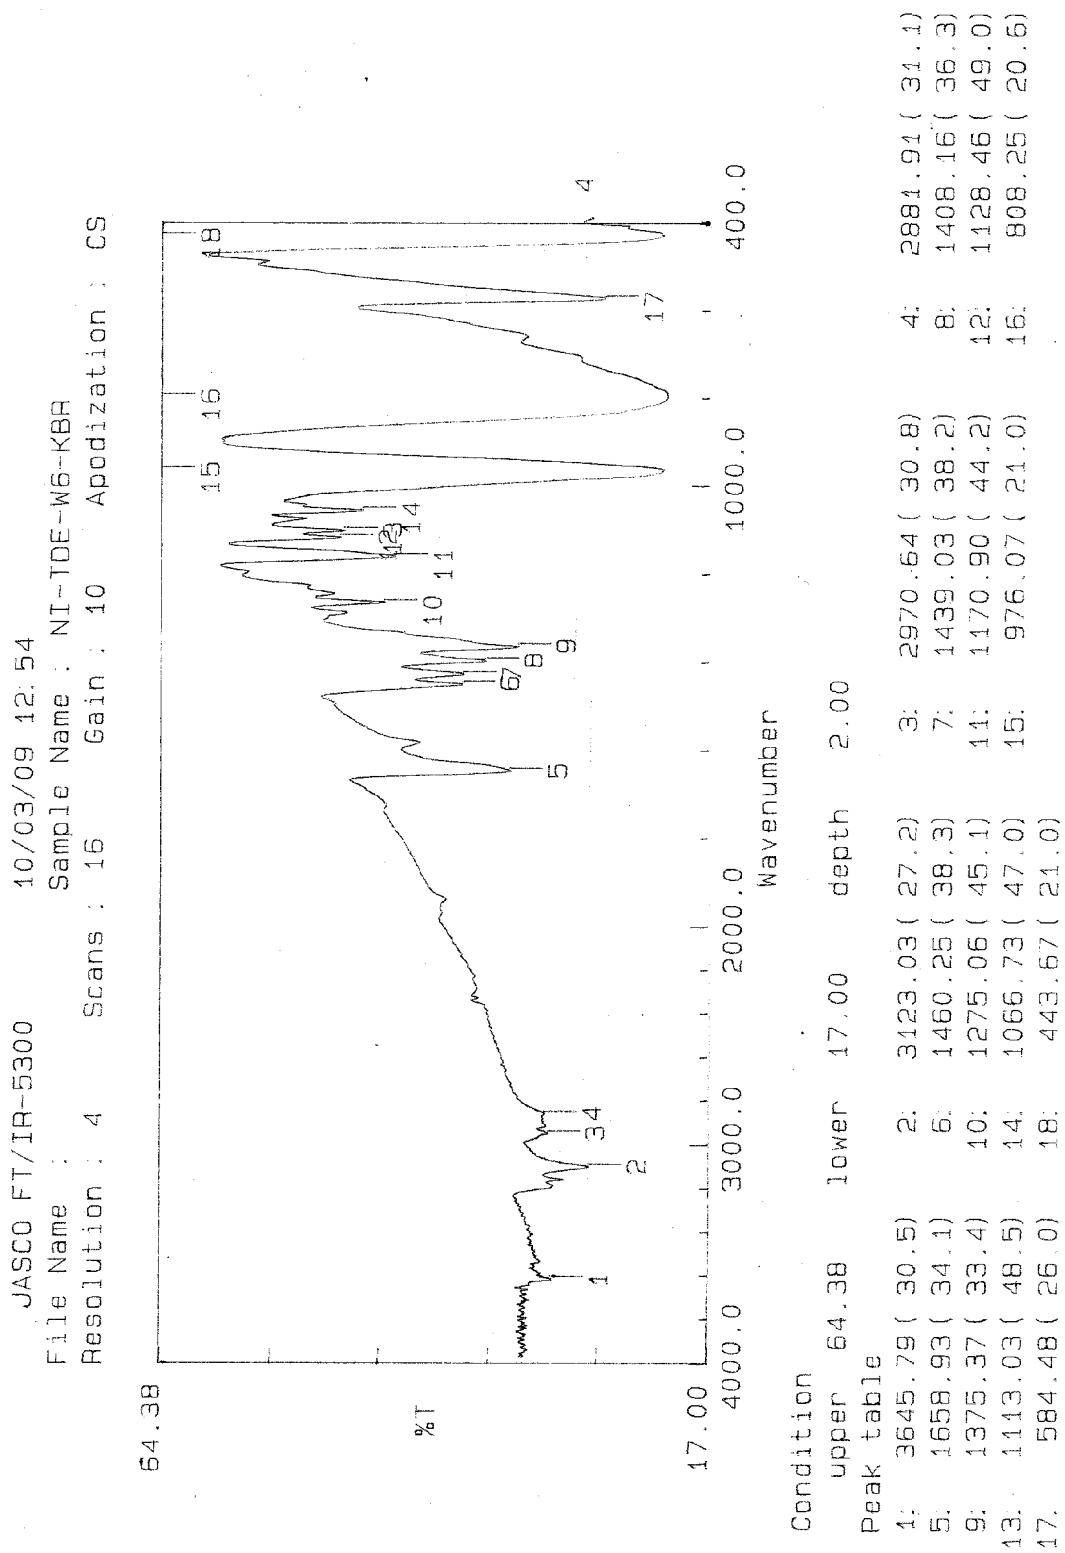

SI-Figure 4. FT-IR spectrum of compound 3 (KBr pellet,  $\text{cm}^{-1}$ )

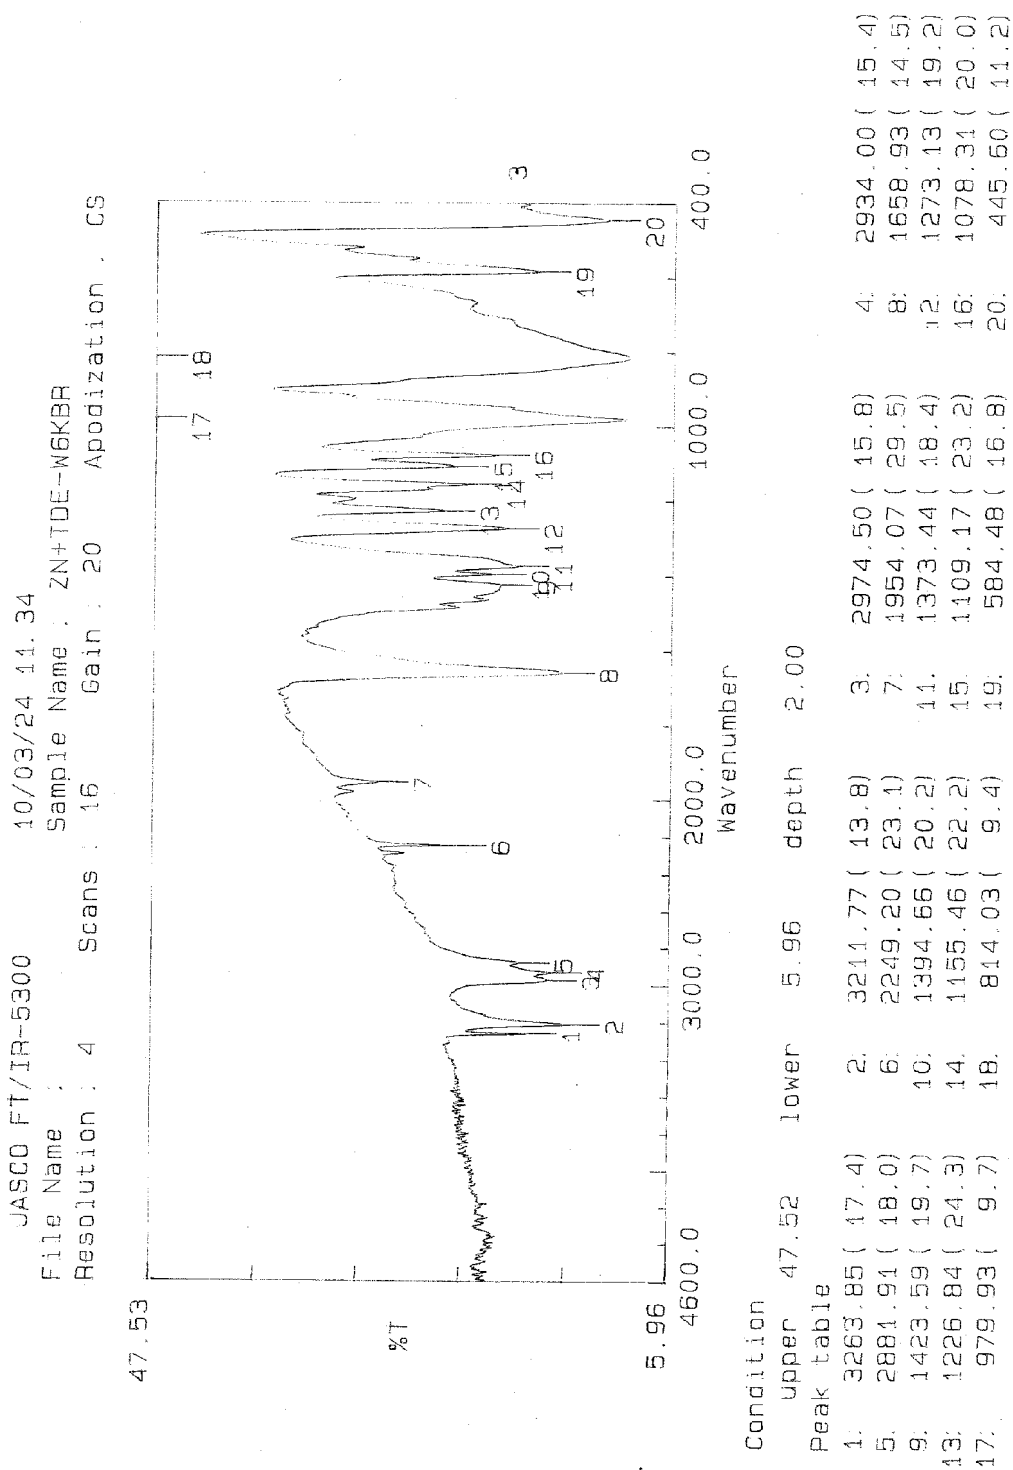

SI-Figure 5. FT-IR spectrum of compound **1a** (KBr pellet,  $\text{cm}^{-1}$ )

JASCO FT/IR-5300 10/03/10 14:35  
 File Name : CO-CL04-KBR  
 Resolution : 4 Scans : 16 Gain : 10 Apodization : CS

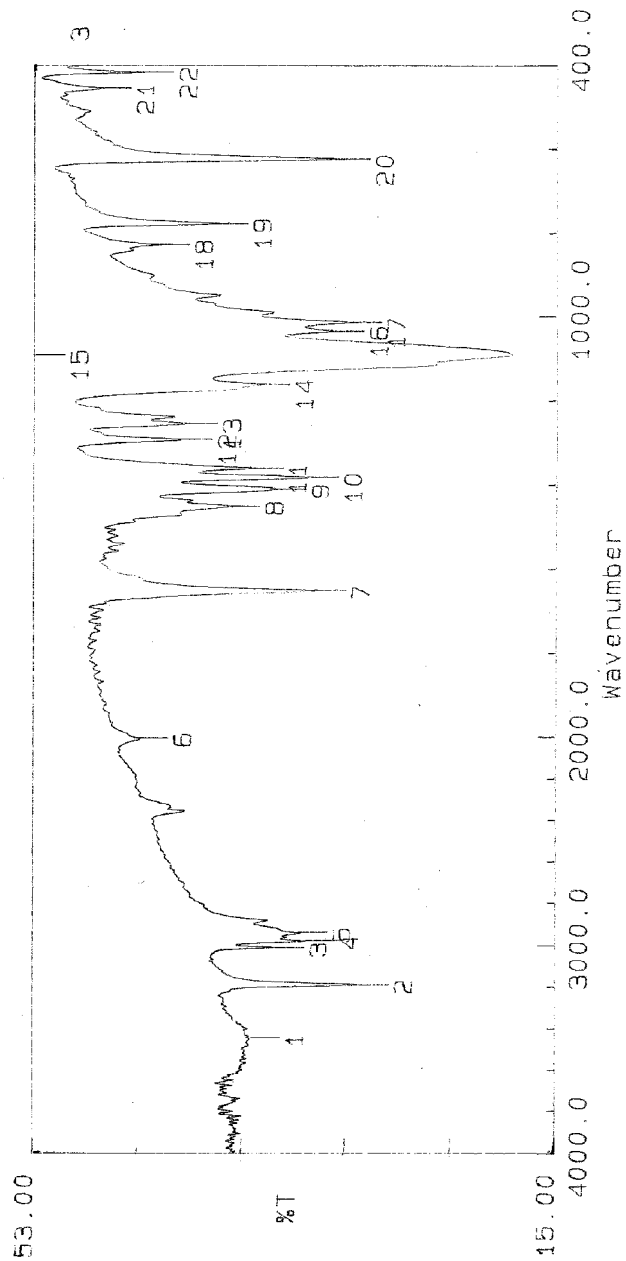

Condition upper 53.00 lower 15.00 depth 2.00

Peak table

|     |                 |     |                 |     |                 |     |                 |
|-----|-----------------|-----|-----------------|-----|-----------------|-----|-----------------|
| 1.  | 3447.10 ( 37.2) | 2.  | 3190.55 ( 29.3) | 3.  | 3011.15 ( 35.5) | 4.  | 2980.29 ( 33.2) |
| 5.  | 2939.78 ( 33.7) | 6.  | 2008.08 ( 45.4) | 7.  | 1651.22 ( 32.4) | 8.  | 1450.60 ( 38.8) |
| 9.  | 1410.09 ( 35.4) | 10. | 1381.16 ( 33.0) | 11. | 1359.94 ( 37.1) | 12. | 1290.49 ( 42.2) |
| 13. | 1253.84 ( 41.9) | 14. | 1161.25 ( 36.7) | 15. | 1091.81 ( 18.2) | 16. | 1035.87 ( 31.2) |
| 17. | 1014.65 ( 29.9) | 18. | 827.54 ( 44.0)  | 19. | 777.38 ( 39.7)  | 20. | 623.05 ( 30.8)  |
| 21. | 455.24 ( 48.2)  | 22. | 416.66 ( 45.1)  |     |                 |     |                 |

SI-Figure 6. FT-IR Spectrum of compound **2a** (KBr pellet,  $\text{cm}^{-1}$ )

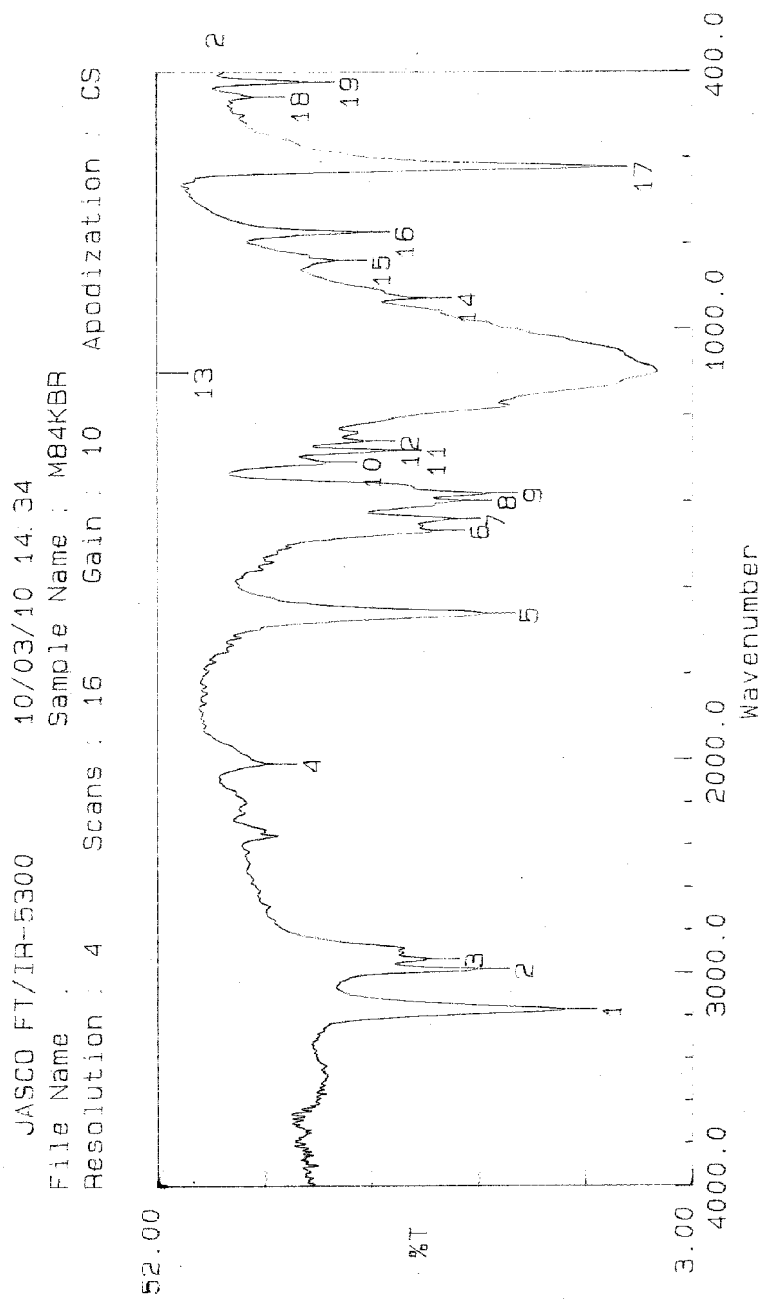

Condition

| upper      | 52.00   | lower   | 3.00 | depth   | 2.00    |
|------------|---------|---------|------|---------|---------|
| Peak table |         |         |      |         |         |
| 1.         | 3173.19 | ( 14.6) | 2.   | 2982.22 | ( 22.7) |
| 5.         | 1660.86 | ( 22.1) | 6.   | 1467.96 | ( 26.7) |
| 9.         | 1381.16 | ( 21.8) | 10.  | 1307.85 | ( 36.6) |
| 13.        | 1101.45 | ( 6.1)  | 14.  | 927.84  | ( 27.9) |
| 17.        | 623.06  | ( 11.6) | 18.  | 459.10  | ( 43.1) |
|            |         |         | 3.   | 2934.00 | ( 27.3) |
|            |         |         | 7.   | 1440.96 | ( 25.3) |
|            |         |         | 11.  | 1280.85 | ( 30.7) |
|            |         |         | 15.  | 839.11  | ( 35.6) |
|            |         |         | 19.  | 424.38  | ( 38.5) |
|            |         |         | 4.   | 2021.58 | ( 42.1) |
|            |         |         | 8.   | 1398.52 | ( 24.2) |
|            |         |         | 12.  | 1259.63 | ( 33.1) |
|            |         |         | 16.  | 773.52  | ( 33.5) |

SI-Figure 7. FT-IR spectrum of compound **3a** (KBr pellet,  $\text{cm}^{-1}$ )

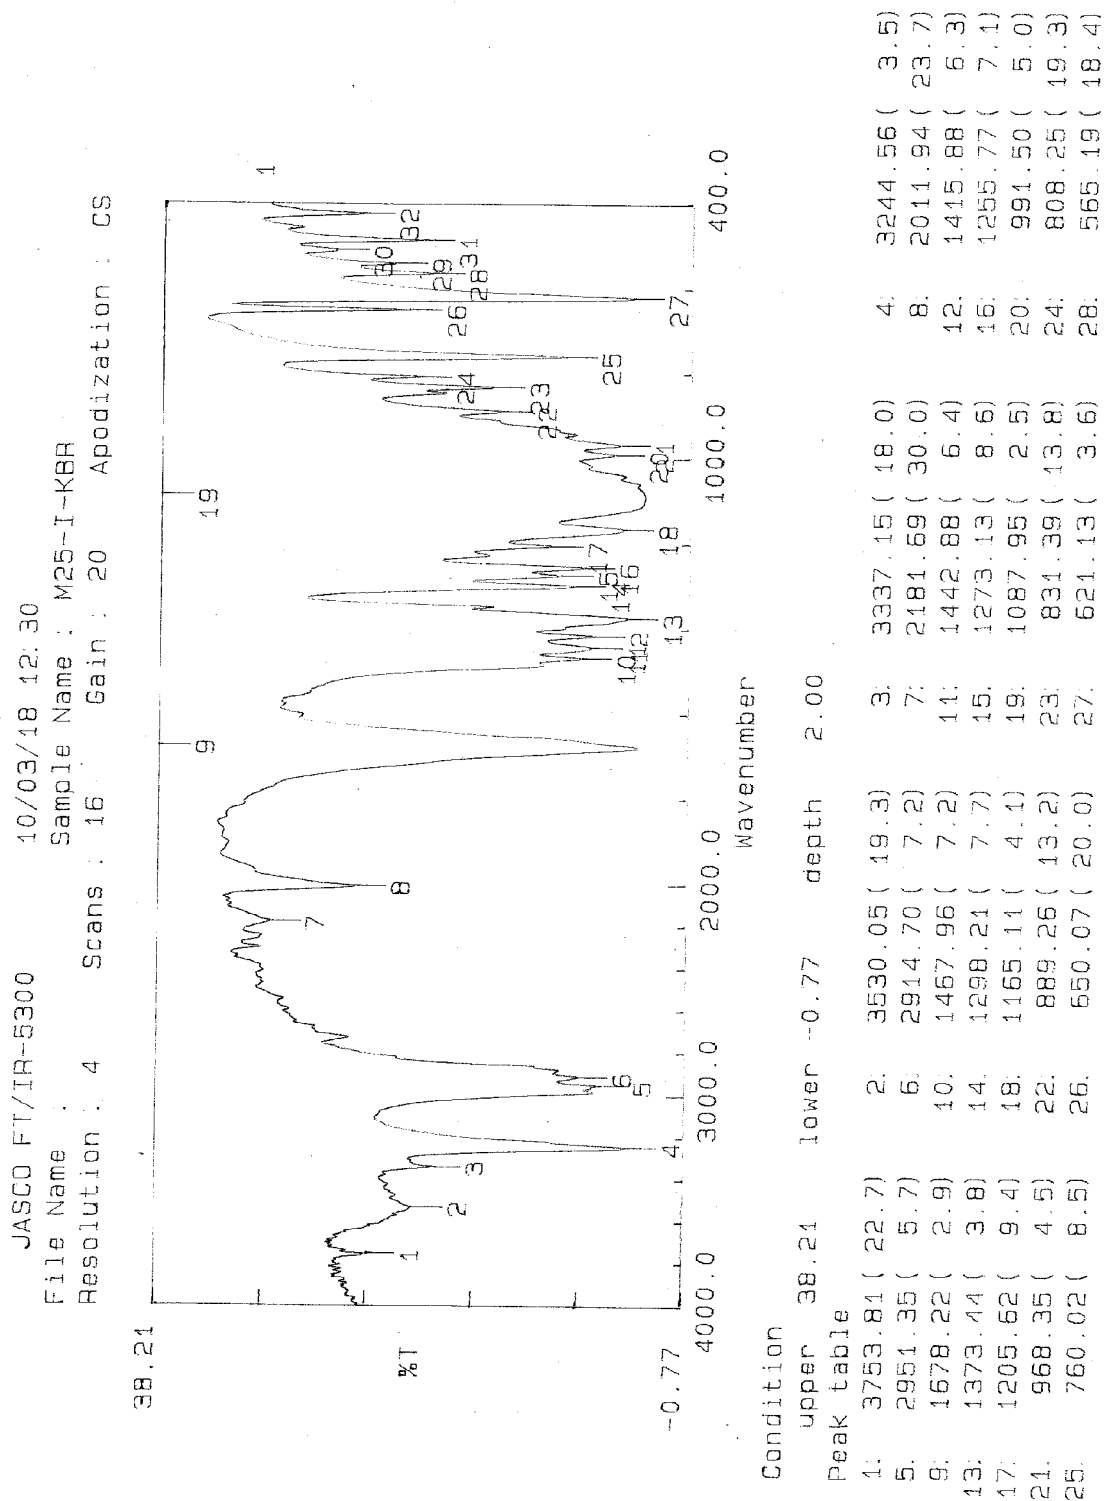



SI-Figure 7. Elemental analysis on compound 1

FLASH EA 1112 SERIES CHN REPORT  
SCHOOL OF CHEMISTRY  
UNIVERSITY OF HYDERABAD

Method filename: I:\Program Files\Thermo Finnigan\Eager 300 for EA1112\DATA\Sys\_data\_exa  
Sample ID: CO-1DE-2CL-MO6 (# 71)  
Analysis type: UnkNown  
Chromatogram filename: UNK-15032010-21.dat  
Sample weight: 1.212

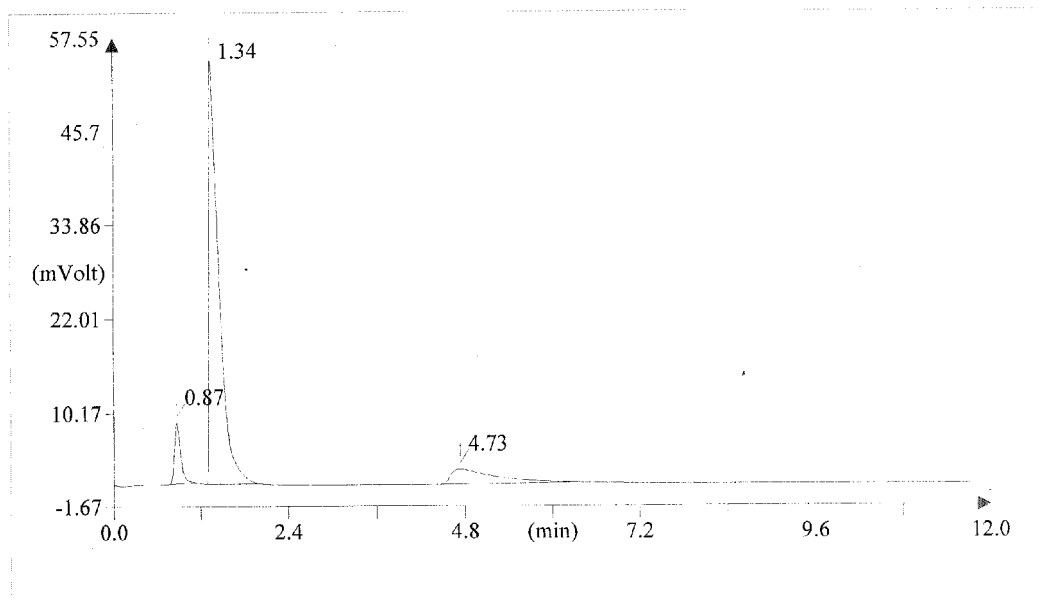

| Element Name | Element % | Ret. Time |
|--------------|-----------|-----------|
| Nitrogen     | 6.68      | 0.87      |
| Carbon       | 22.45     | 1.34      |
| Hydrogen     | 3.71      | 4.73      |

*Handwritten signature*

SI-Figure 8. Elemental analysis on compound 2

FLASH EA 1112 SERIES CHN REPORT  
SCHOOL OF CHEMISTRY  
UNIVERSITY OF HYDERABAD

Method filename: E:\Program Files\Thermo Finnigan\Eager 300 for EA1112\DATA\Sys\_data\_exa  
Sample ID: NI-TDE-N6 (# 70)  
Analysis type: UnkNown  
Chromatogram filename: UNK-15032010-20.dat  
Sample weight: .978

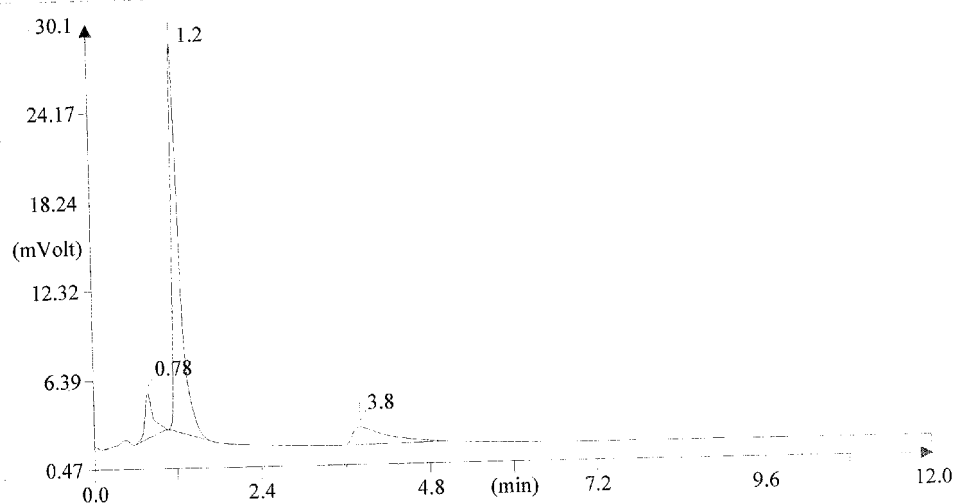

| Element Name | Element % | Ret. Time |
|--------------|-----------|-----------|
| Nitrogen     | 2.85      | 0.78      |
| Carbon       | 12.12     | 1.20      |
| Hydrogen     | 2.10      | 3.80      |

*Bh*

SI-Figure 9. Elemental analysis on compound 3

FLASH EA 1112 SERIES CHN REPORT  
SCHOOL OF CHEMISTRY  
UNIVERSITY OF HYDERABAD

Method filename: I:\Program Files\Thermo Finnigan\Eager 300 for EA1112\DATA\Sys\_data\_exa  
Sample ID: ZN-TDE-W6 (# 24)  
Analysis type: UnkNown  
Chromatogram filename: UNK-30042010-4.dat  
Sample weight: 1.004

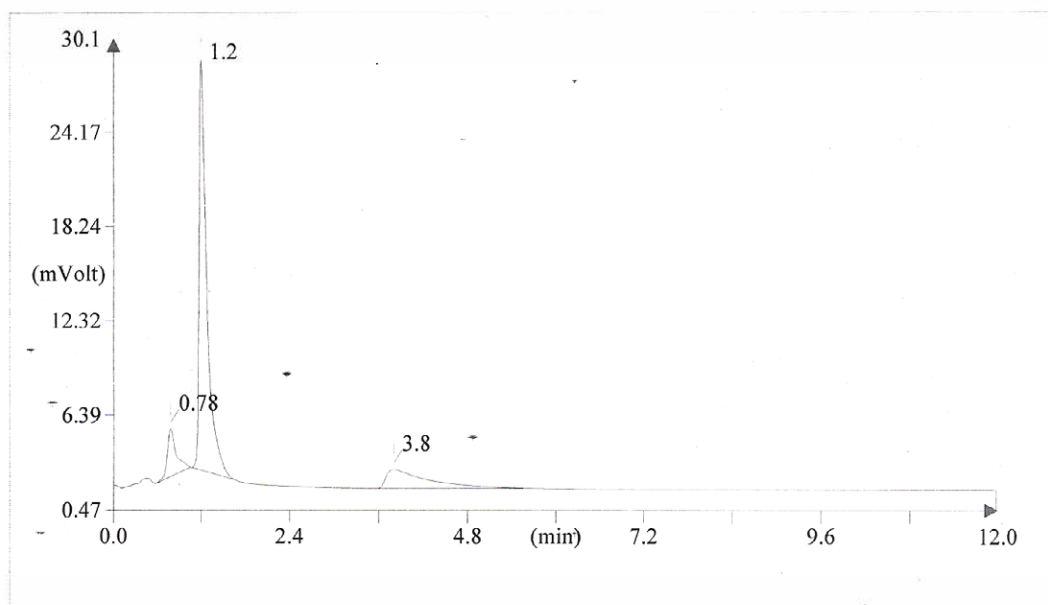

| Element Name | Element % | Ret. Time |
|--------------|-----------|-----------|
| Nitrogen     | 5.23      | 0.78      |
| Carbon       | 18.12     | 1.20      |
| Hydrogen     | 2.86      | 3.80      |

*CB*

SI–Figure 10. Structure of the cations and the geometry around the concerned metal ions in the crystal structures of compounds 1–3.

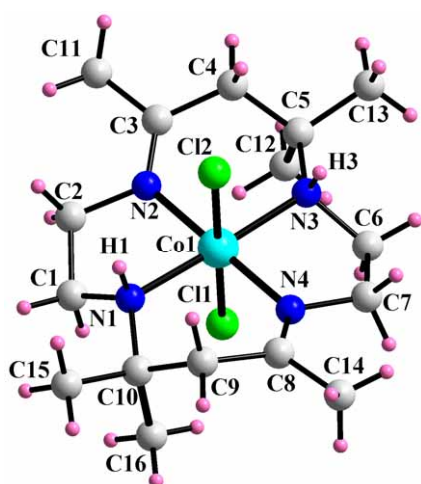

(a)  $[\text{Co}(\text{L})(\text{Cl})_2]^+$ , Octahedral

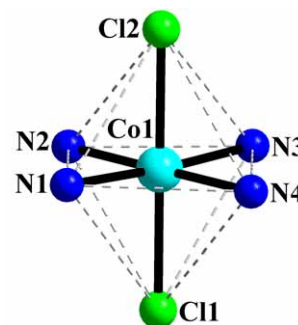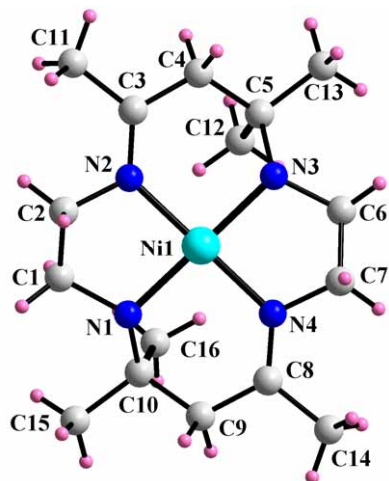

(b)  $[\text{Ni}(\text{L})]^{2+}$ , Square planar

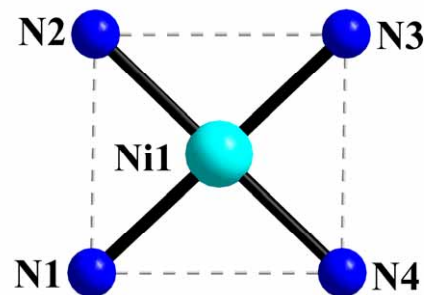

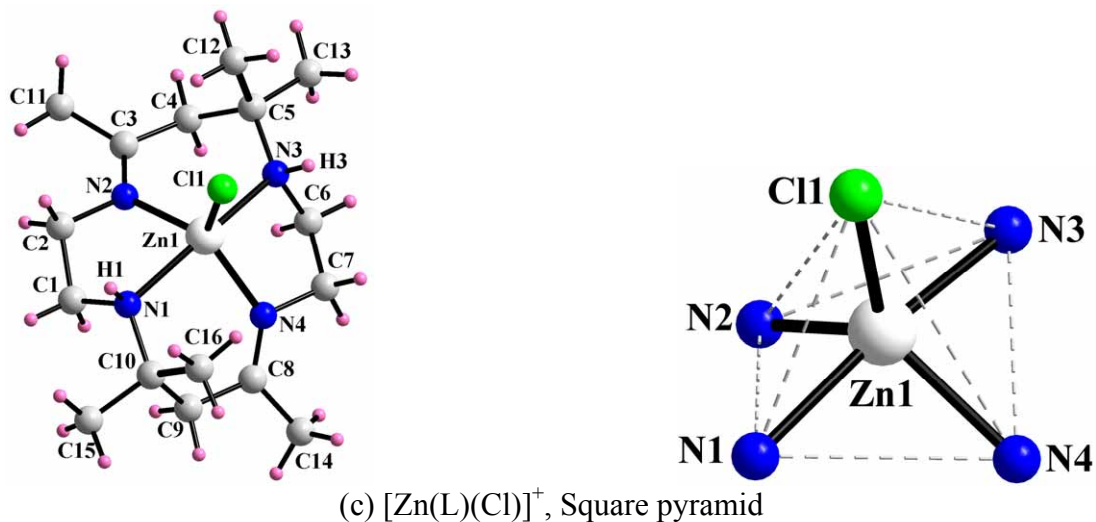

SI-Figure 11. Formation of supramolecular dimer in the crystal structure of compound **3** through hydrogen bonding interactions. Atoms labelled with additional symmetry operations are in accord with that mentioned in Table 4 in the main manuscript.

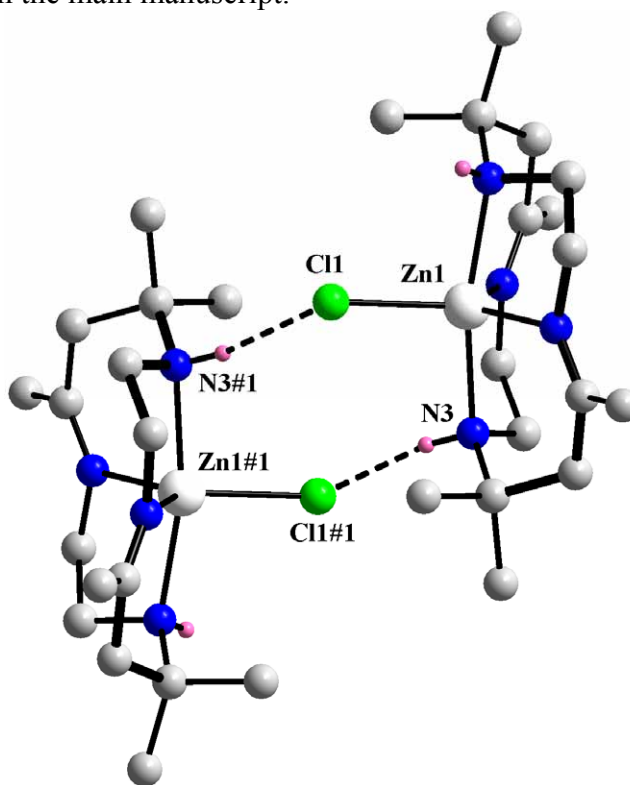

SI-Table 1. Complete list of lengths and angles for the crystal structure of compound **1**

|             |          |             |          |            |          |
|-------------|----------|-------------|----------|------------|----------|
| C(1)–N(1)   | 1.474(5) | C(1)–C(2)   | 1.524(6) | C(2)–N(2)  | 1.480(5) |
| C(3)–N(2)   | 1.277(5) | C(3)–C(4)   | 1.493(6) | C(3)–C(11) | 1.494(5) |
| C(4)–C(5)   | 1.524(6) | C(5)–N(3)   | 1.509(5) | C(5)–C(12) | 1.524(6) |
| C(5)–C(13)  | 1.532(6) | C(6)–N(3)   | 1.475(5) | C(6)–C(7)  | 1.512(6) |
| C(7)–N(4)   | 1.469(6) | C(8)–N(4)   | 1.277(5) | C(8)–C(9)  | 1.496(7) |
| C(8)–C(14)  | 1.498(6) | C(9)–C(10)  | 1.529(7) | C(10)–N(1) | 1.506(5) |
| C(10)–C(16) | 1.522(7) | C(10)–C(15) | 1.526(7) | N(1)–Co(1) | 1.965(3) |

|             |            |             |           |             |            |
|-------------|------------|-------------|-----------|-------------|------------|
| N(1)–H(1)   | 0.82(4)    | N(2)–Co(1)  | 1.921(3)  | N(3)–Co(1)  | 1.973(3)   |
| N(3)–H(3)   | 0.82(5)    | N(4)–Co(1)  | 1.923(3)  | O(1)–Mo(1)  | 1.686(3)   |
| O(2)–Mo(1)  | 1.899(3)   | O(3)–Mo(2)  | 1.895(3)  | O(3)–Mo(1)  | 1.956(3)   |
| O(4)–Mo(2)  | 1.680(3)   | O(5)–Mo(2)  | 1.871(3)  | O(5)–Mo(3)  | 1.983(3)   |
| O(6)–Mo(1)  | 2.3130(4)  | O(6)–Mo(2)  | 2.3159(4) | O(6)–Mo(3)  | 2.3201(4)  |
| O(7)–Mo(3)  | 1.676(3)   | O(8)–Mo(3)  | 1.869(3)  | O(9)–Mo(3)  | 1.893(3)   |
| O(9)–Mo(1)  | 1.952(3)   | O(10)–Mo(1) | 1.881(3)  | Cl(1)–Co(1) | 2.2796(15) |
| Cl(2)–Co(1) | 2.2762(12) |             |           |             |            |

|                   |            |                  |            |
|-------------------|------------|------------------|------------|
| N(1)–C(1)–C(2)    | 107.5(3)   | N(2)–C(2)–C(1)   | 109.9(3)   |
| N(2)–C(3)–C(4)    | 120.8(4)   | N(2)–C(3)–C(11)  | 123.2(4)   |
| C(4)–C(3)–C(11)   | 116.0(4)   | C(3)–C(4)–C(5)   | 117.2(4)   |
| N(3)–C(5)–C(4)    | 106.7(3)   | N(3)–C(5)–C(12)  | 111.7(4)   |
| C(4)–C(5)–C(12)   | 110.1(4)   | N(3)–C(5)–C(13)  | 109.2(4)   |
| C(4)–C(5)–C(13)   | 109.6(4)   | C(12)–C(5)–C(13) | 109.5(4)   |
| N(3)–C(6)–C(7)    | 107.0(4)   | N(4)–C(7)–C(6)   | 111.4(3)   |
| N(4)–C(8)–C(9)    | 120.7(4)   | N(4)–C(8)–C(14)  | 122.9(5)   |
| C(9)–C(8)–C(14)   | 116.3(4)   | C(8)–C(9)–C(10)  | 118.2(4)   |
| N(1)–C(10)–C(16)  | 111.6(4)   | N(1)–C(10)–C(15) | 109.2(4)   |
| C(16)–C(10)–C(15) | 109.9(4)   | N(1)–C(10)–C(9)  | 107.0(4)   |
| C(16)–C(10)–C(9)  | 110.2(4)   | C(15)–C(10)–C(9) | 108.8(4)   |
| C(1)–N(1)–C(10)   | 116.2(3)   | C(1)–N(1)–Co(1)  | 107.7(2)   |
| C(10)–N(1)–Co(1)  | 120.8(3)   | C(3)–N(2)–C(2)   | 119.5(3)   |
| C(3)–N(2)–Co(1)   | 126.6(3)   | C(2)–N(2)–Co(1)  | 113.5(2)   |
| C(6)–N(3)–C(5)    | 117.0(3)   | C(6)–N(3)–Co(1)  | 108.2(3)   |
| C(5)–N(3)–Co(1)   | 120.1(3)   | C(8)–N(4)–C(7)   | 119.9(4)   |
| C(8)–N(4)–Co(1)   | 126.6(3)   | C(7)–N(4)–Co(1)  | 113.2(3)   |
| Mo(2)–O(3)–Mo(1)  | 116.82(14) | Mo(2)–O(5)–Mo(3) | 116.48(14) |
| Mo(1)–O(6)–Mo(2)  | 90.232(14) | Mo(1)–O(6)–Mo(3) | 89.898(14) |
| Mo(2)–O(6)–Mo(3)  | 89.979(13) | Mo(3)–O(9)–Mo(1) | 116.68(14) |
| N(2)–Co(1)–N(4)   | 179.70(14) | N(2)–Co(1)–N(1)  | 83.93(13)  |
| N(4)–Co(1)–N(1)   | 96.29(14)  | N(2)–Co(1)–N(3)  | 95.89(14)  |
| N(4)–Co(1)–N(3)   | 83.88(15)  | N(1)–Co(1)–N(3)  | 176.42(15) |
| N(2)–Co(1)–Cl(2)  | 89.66(10)  | N(4)–Co(1)–Cl(2) | 90.14(11)  |
| N(1)–Co(1)–Cl(2)  | 87.81(11)  | N(3)–Co(1)–Cl(2) | 88.62(11)  |
| N(2)–Co(1)–Cl(1)  | 90.64(10)  | N(4)–Co(1)–Cl(1) | 89.56(11)  |
| N(1)–Co(1)–Cl(1)  | 92.14(11)  | N(3)–Co(1)–Cl(1) | 91.43(11)  |
| Cl(2)–Co(1)–Cl(1) | 179.68(5)  | O(1)–Mo(1)–O(10) | 104.01(15) |
| O(1)–Mo(1)–O(2)   | 104.39(16) | O(10)–Mo(1)–O(2) | 89.85(13)  |
| O(1)–Mo(1)–O(9)   | 101.93(16) | O(10)–Mo(1)–O(9) | 87.38(13)  |
| O(2)–Mo(1)–O(9)   | 153.42(13) | O(1)–Mo(1)–O(3)  | 102.52(15) |
| O(10)–Mo(1)–O(3)  | 153.27(12) | O(2)–Mo(1)–O(3)  | 86.73(13)  |
| O(9)–Mo(1)–O(3)   | 84.01(12)  | O(1)–Mo(1)–O(6)  | 177.54(13) |
| O(10)–Mo(1)–O(6)  | 77.44(9)   | O(2)–Mo(1)–O(6)  | 77.52(9)   |
| O(9)–Mo(1)–O(6)   | 76.07(9)   | O(3)–Mo(1)–O(6)  | 75.94(9)   |
| O(4)–Mo(2)–O(5)   | 104.17(14) | O(4)–Mo(2)–O(3)  | 104.34(16) |
| O(5)–Mo(2)–O(3)   | 90.71(13)  | O(4)–Mo(2)–O(6)  | 177.56(13) |
| O(5)–Mo(2)–O(6)   | 77.78(9)   | O(3)–Mo(2)–O(6)  | 76.98(9)   |
| O(7)–Mo(3)–O(8)   | 104.71(14) | O(7)–Mo(3)–O(9)  | 103.85(16) |
| O(8)–Mo(3)–O(9)   | 90.95(13)  | O(7)–Mo(3)–O(5)  | 102.26(14) |
| O(8)–Mo(3)–O(5)   | 152.86(12) | O(9)–Mo(3)–O(5)  | 85.53(13)  |
| O(7)–Mo(3)–O(6)   | 177.70(11) | O(8)–Mo(3)–O(6)  | 77.37(8)   |
| O(9)–Mo(3)–O(6)   | 76.99(9)   | O(5)–Mo(3)–O(6)  | 75.62(8)   |

SI-Table 2. Complete list of lengths and angles for the crystal structure of compound **2**

|             |           |             |           |             |           |
|-------------|-----------|-------------|-----------|-------------|-----------|
| C(1)–N(1)   | 1.494(10) | C(1)–C(2)   | 1.498(12) | C(2)–N(2)   | 1.460(11) |
| C(3)–N(2)   | 1.285(11) | C(3)–C(4)   | 1.485(12) | C(3)–C(11)  | 1.503(12) |
| C(4)–C(5)   | 1.542(12) | C(5)–N(3)   | 1.512(11) | C(5)–C(13)  | 1.513(12) |
| C(5)–C(12)  | 1.529(12) | C(6)–N(3)   | 1.476(11) | C(6)–C(7)   | 1.490(12) |
| C(7)–N(4)   | 1.470(11) | C(8)–N(4)   | 1.284(11) | C(8)–C(9)   | 1.492(12) |
| C(8)–C(14)  | 1.507(12) | C(9)–C(10)  | 1.518(12) | C(10)–N(1)  | 1.492(11) |
| C(10)–C(15) | 1.532(13) | C(10)–C(16) | 1.533(13) | C(17)–Cl(2) | 1.764(10) |
| C(17)–Cl(1) | 1.771(10) | C(18)–S(1)  | 1.795(9)  | C(19)–S(1)  | 1.784(10) |
| N(1)–Ni(1)  | 1.920(7)  | N(2)–Ni(1)  | 1.900(7)  | N(3)–Ni(1)  | 1.930(7)  |
| N(4)–Ni(1)  | 1.891(7)  | O(1)–W(5)   | 1.707(6)  | O(2)–W(5)   | 1.941(5)  |
| O(2)–W(4)   | 1.948(5)  | O(3)–W(3)   | 1.920(5)  | O(3)–W(5)   | 1.926(5)  |
| O(4)–W(3)   | 1.918(5)  | O(4)–W(4)   | 1.927(6)  | O(5)–W(5)   | 1.921(6)  |
| O(5)–W(1)   | 1.927(6)  | O(6)–W(4)   | 2.314(5)  | O(6)–W(6)   | 2.326(5)  |
| O(6)–W(5)   | 2.326(5)  | O(6)–W(3)   | 2.326(5)  | O(6)–W(1)   | 2.329(5)  |
| O(6)–W(2)   | 2.334(5)  | O(7)–W(3)   | 1.711(6)  | O(8)–W(1)   | 1.920(6)  |
| O(8)–W(3)   | .925(5)   | O(9)–W(2)   | 1.921(6)  | O(9)–W(3)   | 1.925(5)  |
| O(10)–W(1)  | 1.702(6)  | O(11)–W(2)  | 1.919(5)  | O(11)–W(1)  | 1.931(5)  |
| O(12)–W(2)  | 1.699(6)  | O(13)–W(6)  | 1.912(6)  | O(13)–W(1)  | 1.934(6)  |
| O(14)–W(4)  | 1.906(6)  | O(14)–W(2)  | 1.936(5)  | O(15)–W(6)  | 1.919(6)  |
| O(15)–W(2)  | 1.923(6)  | O(16)–W(6)  | 1.702(6)  | O(17)–W(4)  | 1.916(5)  |
| O(17)–W(6)  | 1.936(5)  | O(18)–W(6)  | 1.933(6)  | O(18)–W(5)  | 1.939(6)  |
| O(19)–W(4)  | 1.706(6)  | O(20)–S(1)  | 1.501(7)  |             |           |

|                   |           |                  |           |
|-------------------|-----------|------------------|-----------|
| N(1)–C(1)–C(2)    | 107.9(7)  | N(2)–C(2)–C(1)   | 106.2(7)  |
| N(2)–C(3)–C(4)    | 122.6(8)  | N(2)–C(3)–C(11)  | 122.8(8)  |
| C(4)–C(3)–C(11)   | 114.5(7)  | C(3)–C(4)–C(5)   | 120.0(7)  |
| N(3)–C(5)–C(13)   | 110.7(7)  | N(3)–C(5)–C(12)  | 109.6(7)  |
| C(13)–C(5)–C(12)  | 110.6(8)  | N(3)–C(5)–C(4)   | 106.0(7)  |
| C(13)–C(5)–C(4)   | 108.5(7)  | C(12)–C(5)–C(4)  | 111.3(7)  |
| N(3)–C(6)–C(7)    | 108.5(7)  | N(4)–C(7)–C(6)   | 107.9(7)  |
| N(4)–C(8)–C(14)   | 122.9(8)  | C(9)–C(8)–C(14)  | 114.6(7)  |
| C(8)–C(9)–C(10)   | 119.5(7)  | N(1)–C(10)–C(9)  | 107.1(7)  |
| N(1)–C(10)–C(15)  | 110.4(7)  | C(9)–C(10)–C(15) | 107.7(7)  |
| N(1)–C(10)–C(16)  | 111.1(7)  | C(9)–C(10)–C(16) | 110.8(7)  |
| C(15)–C(10)–C(16) | 109.7(8)  | C(10)–N(1)–C(1)  | 114.7(7)  |
| C(10)–N(1)–Ni(1)  | 114.4(5)  | C(1)–N(1)–Ni(1)  | 108.1(5)  |
| C(3)–N(2)–C(2)    | 120.0(7)  | C(3)–N(2)–Ni(1)  | 129.5(6)  |
| C(2)–N(2)–Ni(1)   | 110.4(5)  | C(6)–N(3)–C(5)   | 112.9(7)  |
| C(6)–N(3)–Ni(1)   | 108.6(5)  | C(5)–N(3)–Ni(1)  | 113.6(5)  |
| C(8)–N(4)–C(7)    | 120.5(7)  | C(8)–N(4)–Ni(1)  | 129.2(6)  |
| C(7)–N(4)–Ni(1)   | 109.9(5)  | N(4)–Ni(1)–N(2)  | 173.8(3)  |
| N(4)–Ni(1)–N(1)   | 92.9(3)   | N(2)–Ni(1)–N(1)  | 87.2(3)   |
| N(4)–Ni(1)–N(3)   | 87.5(3)   | N(2)–Ni(1)–N(3)  | 92.4(3)   |
| N(1)–Ni(1)–N(3)   | 179.6(3)  | W(5)–O(2)–W(4)   | 116.4(3)  |
| W(3)–O(3)–W(5)    | 117.7(3)  | W(3)–O(4)–W(4)   | 117.2(3)  |
| W(5)–O(5)–W(1)    | 117.5(3)  | W(4)–O(6)–W(6)   | 90.21(19) |
| W(4)–O(6)–W(5)    | 90.84(19) | W(6)–O(6)–W(5)   | 90.13(18) |
| W(4)–O(6)–W(3)    | 90.02(18) | W(6)–O(6)–W(3)   | 179.7(3)  |
| W(5)–O(6)–W(3)    | 90.07(19) | W(4)–O(6)–W(1)   | 179.2(3)  |
| W(6)–O(6)–W(1)    | 89.88(18) | W(5)–O(6)–W(1)   | 89.91(18) |
| W(3)–O(6)–W(1)    | 89.88(19) | W(4)–O(6)–W(2)   | 89.57(18) |
| W(6)–O(6)–W(2)    | 89.96(19) | W(5)–O(6)–W(2)   | 179.6(3)  |
| W(3)–O(6)–W(2)    | 89.84(18) | W(1)–O(6)–W(2)   | 89.68(18) |
| W(1)–O(8)–W(3)    | 117.5(3)  | W(2)–O(9)–W(3)   | 117.7(3)  |

|                  |          |                  |          |
|------------------|----------|------------------|----------|
| W(2)–O(11)–W(1)  | 117.3(3) | W(6)–O(13)–W(1)  | 117.5(3) |
| W(4)–O(14)–W(2)  | 116.9(3) | W(6)–O(15)–W(2)  | 118.1(3) |
| W(4)–O(17)–W(6)  | 117.2(3) | W(6)–O(18)–W(5)  | 116.6(3) |
| O(20)–S(1)–C(19) | 104.5(5) | O(20)–S(1)–C(18) | 105.5(4) |
| C(19)–S(1)–C(18) | 97.7(5)  | O(10)–W(1)–O(8)  | 104.8(3) |
| O(10)–W(1)–O(5)  | 103.1(3) | O(8)–W(1)–O(5)   | 87.1(2)  |
| O(10)–W(1)–O(11) | 104.1(3) | O(5)–W(1)–O(11)  | 152.7(2) |
| O(10)–W(1)–O(13) | 102.8(3) | O(8)–W(1)–O(13)  | 152.4(2) |
| O(5)–W(1)–O(13)  | 85.9(2)  | O(11)–W(1)–O(13) | 86.8(2)  |
| O(10)–W(1)–O(6)  | 178.8(3) | O(8)–W(1)–O(6)   | 76.3(2)  |
| O(5)–W(1)–O(6)   | 76.2(2)  | O(11)–W(1)–O(6)  | 76.5(2)  |
| O(13)–W(1)–O(6)  | 76.1(2)  | O(12)–W(2)–O(11) | 103.4(3) |
| O(12)–W(2)–O(9)  | 103.7(3) | O(11)–W(2)–O(9)  | 87.1(2)  |
| O(12)–W(2)–O(15) | 104.3(3) | O(11)–W(2)–O(15) | 86.9(2)  |
| O(9)–W(2)–O(15)  | 152.0(2) | O(12)–W(2)–O(14) | 103.8(3) |
| O(11)–W(2)–O(14) | 152.8(2) | O(9)–W(2)–O(14)  | 86.4(2)  |
| O(15)–W(2)–O(14) | 86.5(2)  | O(12)–W(2)–O(6)  | 179.9(3) |
| O(11)–W(2)–O(6)  | 76.6(2)  | O(9)–W(2)–O(6)   | 76.2(2)  |
| O(15)–W(2)–O(6)  | 75.9(2)  | O(14)–W(2)–O(6)  | 76.2(2)  |
| O(7)–W(3)–O(4)   | 103.9(3) | O(7)–W(3)–O(3)   | 103.4(3) |
| O(4)–W(3)–O(3)   | 86.7(2)  | O(7)–W(3)–O(9)   | 104.1(3) |
| O(4)–W(3)–O(9)   | 86.9(2)  | O(3)–W(3)–O(9)   | 152.5(2) |
| O(7)–W(3)–O(8)   | 103.4(3) | O(4)–W(3)–O(8)   | 152.6(2) |
| O(3)–W(3)–O(8)   | 86.6(2)  | O(9)–W(3)–O(8)   | 86.9(2)  |
| O(7)–W(3)–O(6)   | 179.5(2) | O(4)–W(3)–O(6)   | 76.3(2)  |
| O(3)–W(3)–O(6)   | 76.2(2)  | O(9)–W(3)–O(6)   | 76.3(2)  |
| O(8)–W(3)–O(6)   | 76.3(2)  | O(19)–W(4)–O(14) | 104.6(3) |
| O(19)–W(4)–O(17) | 104.1(3) | O(14)–W(4)–O(17) | 87.6(2)  |
| O(19)–W(4)–O(4)  | 102.7(3) | O(14)–W(4)–O(4)  | 87.2(2)  |
| O(17)–W(4)–O(4)  | 153.1(2) | O(19)–W(4)–O(2)  | 101.6(3) |
| O(14)–W(4)–O(2)  | 153.8(2) | O(17)–W(4)–O(2)  | 86.6(2)  |
| O(4)–W(4)–O(2)   | 86.5(2)  | O(19)–W(4)–O(6)  | 177.9(3) |
| O(14)–W(4)–O(6)  | 77.3(2)  | O(17)–W(4)–O(6)  | 76.6(2)  |
| O(4)–W(4)–O(6)   | 76.5(2)  | O(2)–W(4)–O(6)   | 76.5(2)  |
| O(1)–W(5)–O(5)   | 104.3(3) | O(1)–W(5)–O(3)   | 105.0(3) |
| O(5)–W(5)–O(3)   | 87.4(2)  | O(1)–W(5)–O(18)  | 102.3(3) |
| O(5)–W(5)–O(18)  | 86.8(2)  | O(3)–W(5)–O(18)  | 152.7(2) |
| O(1)–W(5)–O(2)   | 103.0(3) | O(5)–W(5)–O(2)   | 152.7(2) |
| O(3)–W(5)–O(2)   | 86.7(2)  | O(18)–W(5)–O(2)  | 86.3(2)  |
| O(1)–W(5)–O(6)   | 178.7(3) | O(5)–W(5)–O(6)   | 76.4(2)  |
| O(3)–W(5)–O(6)   | 76.1(2)  | O(18)–W(5)–O(6)  | 76.6(2)  |
| O(2)–W(5)–O(6)   | 76.3(2)  | O(16)–W(6)–O(13) | 103.7(3) |
| O(16)–W(6)–O(15) | 103.2(3) | O(13)–W(6)–O(15) | 87.5(2)  |
| O(16)–W(6)–O(18) | 103.9(3) | O(13)–W(6)–O(18) | 87.1(2)  |
| O(15)–W(6)–O(18) | 152.8(2) | O(16)–W(6)–O(17) | 103.7(3) |
| O(13)–W(6)–O(17) | 152.5(2) | O(15)–W(6)–O(17) | 85.9(2)  |
| O(18)–W(6)–O(17) | 86.7(2)  | O(16)–W(6)–O(6)  | 179.3(3) |
| O(13)–W(6)–O(6)  | 76.6(2)  | O(15)–W(6)–O(6)  | 76.1(2)  |
| O(18)–W(6)–O(6)  | 76.7(2)  | O(17)–W(6)–O(6)  | 76.0(2)  |

SI–Table 3. Complete list of lengths and angles for the crystal structure of compound **3**

|           |           |           |           |            |           |
|-----------|-----------|-----------|-----------|------------|-----------|
| C(1)–N(1) | 1.462(9)  | C(1)–C(2) | 1.526(10) | C(2)–N(2)  | 1.474(9)  |
| C(3)–N(2) | 1.273(8)  | C(3)–C(4) | 1.481(11) | C(3)–C(11) | 1.507(10) |
| C(4)–C(5) | 1.546(12) | C(5)–N(3) | 1.476(9)  | C(5)–C(12) | 1.525(11) |



|             |           |             |           |             |           |
|-------------|-----------|-------------|-----------|-------------|-----------|
| C(5)–C(13)  | 1.553(10) | C(6)–N(3)   | 1.485(9)  | C(6)–C(7)   | 1.502(10) |
| C(7)–N(4)   | 1.483(9)  | C(8)–N(4)   | 1.264(8)  | C(8)–C(9)   | 1.497(10) |
| C(8)–C(14)  | 1.498(10) | C(9)–C(10)  | 1.524(10) | C(10)–N(1)  | 1.498(9)  |
| C(10)–C(16) | 1.541(10) | C(10)–C(15) | 1.547(10) | Cl(1)–Zn(1) | 2.302(2)  |
| N(1)–Zn(1)  | 2.150(6)  | N(1)–H(1)   | 0.71(5)   | N(2)–Zn(1)  | 2.086(6)  |
| N(3)–Zn(1)  | 2.151(6)  | N(3)–H(3)   | 0.83(5)   | N(4)–Zn(1)  | 2.070(6)  |
| O(1)–W(1)   | 1.701(5)  | O(2)–W(2)   | 1.919(5)  | O(2)–W(1)   | 1.929(4)  |
| O(3)–W(2)   | 1.704(5)  | O(4)–W(2)   | 1.930(4)  | O(5)–W(3)   | 1.923(5)  |
| O(5)–W(2)   | 1.926(5)  | O(6)–W(3)   | 1.917(4)  | O(7)–W(3)   | 1.698(5)  |
| O(8)–W(3)   | 1.917(5)  | O(9)–W(3)   | 1.924(4)  | O(9)–W(1)   | 1.929(5)  |
| O(10)–W(1)  | 2.3135(4) | O(10)–W(3)  | 2.3257(4) | O(10)–W(2)  | 2.3339(4) |

|                  |            |                   |            |
|------------------|------------|-------------------|------------|
| N(1)–C(1)–C(2)   | 108.8(6)   | N(2)–C(2)–C(1)    | 109.1(6)   |
| N(2)–C(3)–C(4)   | 120.8(7)   | N(2)–C(3)–C(11)   | 123.9(7)   |
| C(4)–C(3)–C(11)  | 115.3(7)   | C(3)–C(4)–C(5)    | 120.5(7)   |
| N(3)–C(5)–C(12)  | 109.0(7)   | N(3)–C(5)–C(4)    | 109.2(7)   |
| C(12)–C(5)–C(4)  | 109.2(8)   | N(3)–C(5)–C(13)   | 111.1(7)   |
| C(12)–C(5)–C(13) | 109.4(7)   | C(4)–C(5)–C(13)   | 108.9(7)   |
| N(3)–C(6)–C(7)   | 109.9(6)   | N(4)–C(7)–C(6)    | 110.4(6)   |
| N(4)–C(8)–C(9)   | 121.4(7)   | N(4)–C(8)–C(14)   | 123.9(7)   |
| C(9)–C(8)–C(14)  | 114.7(7)   | C(8)–C(9)–C(10)   | 123.2(6)   |
| N(1)–C(10)–C(9)  | 110.2(6)   | N(1)–C(10)–C(16)  | 107.7(6)   |
| C(9)–C(10)–C(16) | 110.0(6)   | N(1)–C(10)–C(15)  | 110.2(6)   |
| C(9)–C(10)–C(15) | 108.5(6)   | C(16)–C(10)–C(15) | 110.3(6)   |
| C(1)–N(1)–C(10)  | 116.3(6)   | C(1)–N(1)–Zn(1)   | 105.6(4)   |
| C(10)–N(1)–Zn(1) | 116.5(5)   | C(1)–N(1)–H(1)    | 99(5)      |
| C(10)–N(1)–H(1)  | 111(5)     | C(3)–N(2)–C(2)    | 120.6(6)   |
| C(3)–N(2)–Zn(1)  | 129.4(5)   | C(2)–N(2)–Zn(1)   | 108.2(4)   |
| C(5)–N(3)–C(6)   | 117.4(6)   | C(5)–N(3)–Zn(1)   | 118.9(5)   |
| C(6)–N(3)–Zn(1)  | 104.5(4)   | C(8)–N(4)–C(7)    | 121.3(6)   |
| C(8)–N(4)–Zn(1)  | 130.3(5)   | C(7)–N(4)–Zn(1)   | 108.4(4)   |
| W(2)–O(2)–W(1)   | 117.2(2)   | W(3)–O(5)–W(2)    | 117.8(2)   |
| W(3)–O(9)–W(1)   | 116.6(2)   | W(1)–O(10)–W(3)   | 89.909(12) |
| W(1)–O(10)–W(2)  | 89.951(15) | W(3)–O(10)–W(2)   | 90.018(16) |
| O(1)–W(1)–O(9)   | 103.0(2)   | O(1)–W(1)–O(2)    | 104.6(2)   |
| O(9)–W(1)–O(2)   | 86.77(19)  | O(1)–W(1)–O(10)   | 178.83(17) |
| O(9)–W(1)–O(10)  | 76.85(13)  | O(2)–W(1)–O(10)   | 76.60(13)  |
| O(3)–W(2)–O(2)   | 103.4(2)   | O(3)–W(2)–O(5)    | 104.6(2)   |
| O(2)–W(2)–O(5)   | 86.82(19)  | O(3)–W(2)–O(4)    | 104.4(2)   |
| O(2)–W(2)–O(4)   | 152.15(19) | O(5)–W(2)–O(4)    | 86.52(19)  |
| O(3)–W(2)–O(10)  | 179.3(2)   | O(2)–W(2)–O(10)   | 76.27(13)  |
| O(5)–W(2)–O(10)  | 75.98(13)  | O(4)–W(2)–O(10)   | 75.88(13)  |
| O(7)–W(3)–O(8)   | 103.9(3)   | O(7)–W(3)–O(6)    | 102.8(2)   |
| O(8)–W(3)–O(6)   | 86.4(2)    | O(8)–W(3)–O(5)    | 152.73(19) |
| O(6)–W(3)–O(5)   | 86.8(2)    | O(7)–W(3)–O(9)    | 104.2(2)   |
| O(8)–W(3)–O(9)   | 87.1(2)    | O(6)–W(3)–O(9)    | 152.9(2)   |
| O(5)–W(3)–O(9)   | 87.03(19)  | O(7)–W(3)–O(10)   | 179.04(19) |
| O(8)–W(3)–O(10)  | 76.50(14)  | O(6)–W(3)–O(10)   | 76.31(14)  |
| O(5)–W(3)–O(10)  | 76.23(13)  | O(9)–W(3)–O(10)   | 76.64(13)  |
| N(4)–Zn(1)–N(2)  | 120.4(2)   | N(4)–Zn(1)–N(1)   | 91.3(2)    |
| N(2)–Zn(1)–N(1)  | 83.1(2)    | N(4)–Zn(1)–N(3)   | 84.1(2)    |
| N(2)–Zn(1)–N(3)  | 89.6(2)    | N(1)–Zn(1)–N(3)   | 168.0(2)   |
| N(4)–Zn(1)–Cl(1) | 122.47(17) | N(2)–Zn(1)–Cl(1)  | 117.10(17) |
| N(1)–Zn(1)–Cl(1) | 93.44(18)  | N(3)–Zn(1)–Cl(1)  | 98.43(18)  |

\*\*\*\*\*END\*\*\*\*\*
